# Supplementary material for: A retrospective analysis of melioidosis in Cambodian children, 2009–2013
Source: PubMed Central journal article supplement (PMC5117556; doi:10.1186/s12879-016-2034-9), 2016-11-21

## **Supporting Information**

### **A Retrospective Analysis of Melioidosis in Cambodian Children, 2009 – 2013**

Paul Turner, Sabine Kloprogge, Thyl Miliya, Sona Soeng, Pisey Tan, Poda Sar, Pagnarith Yos, Catrin E Moore, Vanaporn Wuthiekanun, Direk Limmathurotsakul, Claudia Turner, Nicholas PJ Day, David AB Dance

*Figure S1. Study flow chart*

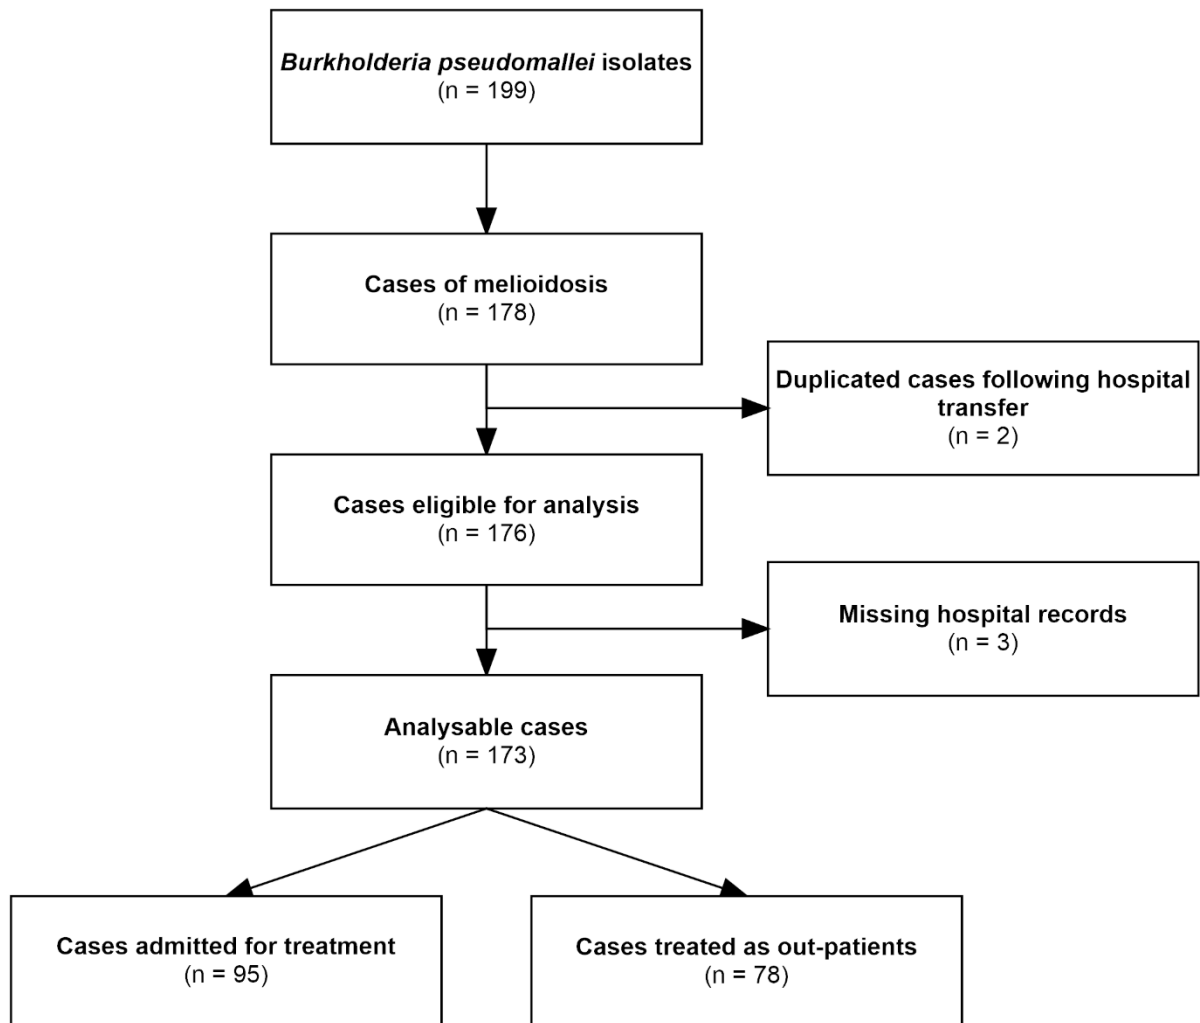

**Figure S2. Number of culture-confirmed melioidosis cases presenting to Angkor Hospital for Children, 2009 - 2013**

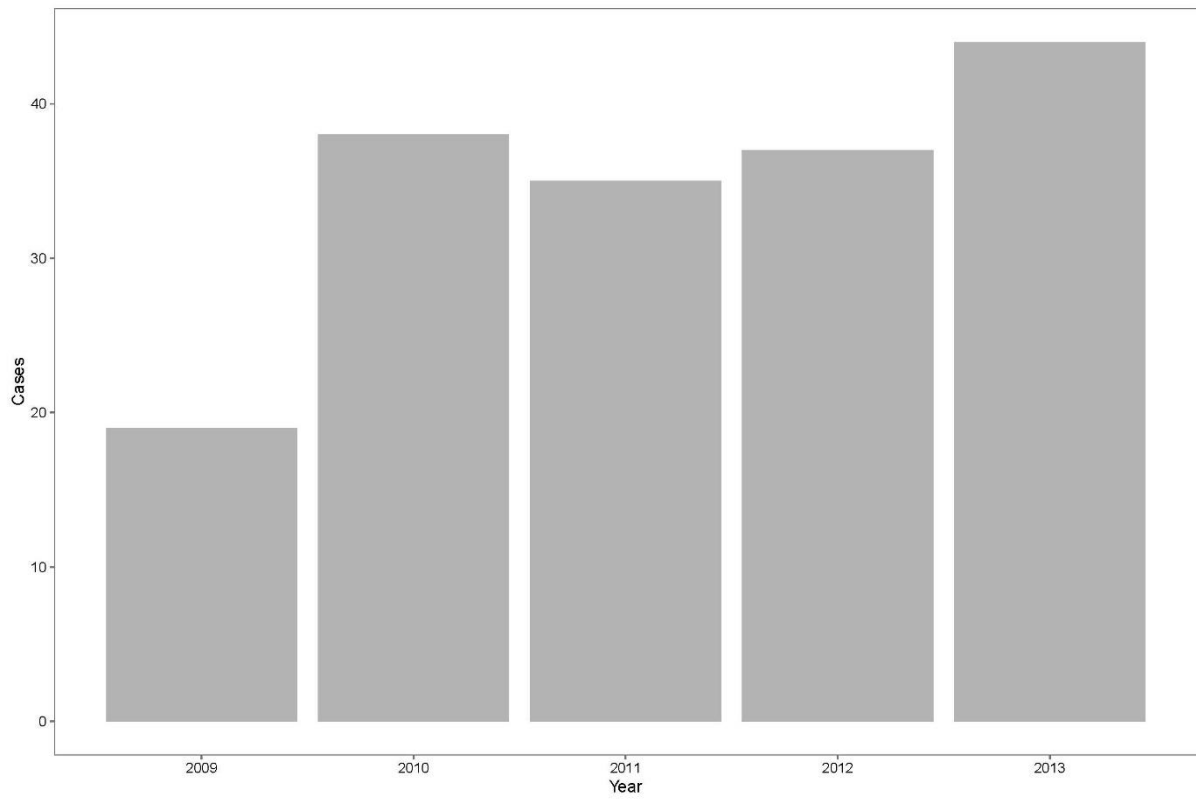

**Figure S3. Commune-level geographic distribution of culture-confirmed melioidosis cases from all provinces presenting to Angkor Hospital for Children, 2009 – 2013.**

Patients were mapped to the commune-level using data from the Cambodia National Census, 2008. Cambodia is shaded light grey with surrounding countries shaded dark grey.

Study data overlaid on the Open Development Cambodia basemap

[<http://www.opendevelopmentcambodia.net/maps/downloads/>. Accessed 1st July 2016.]

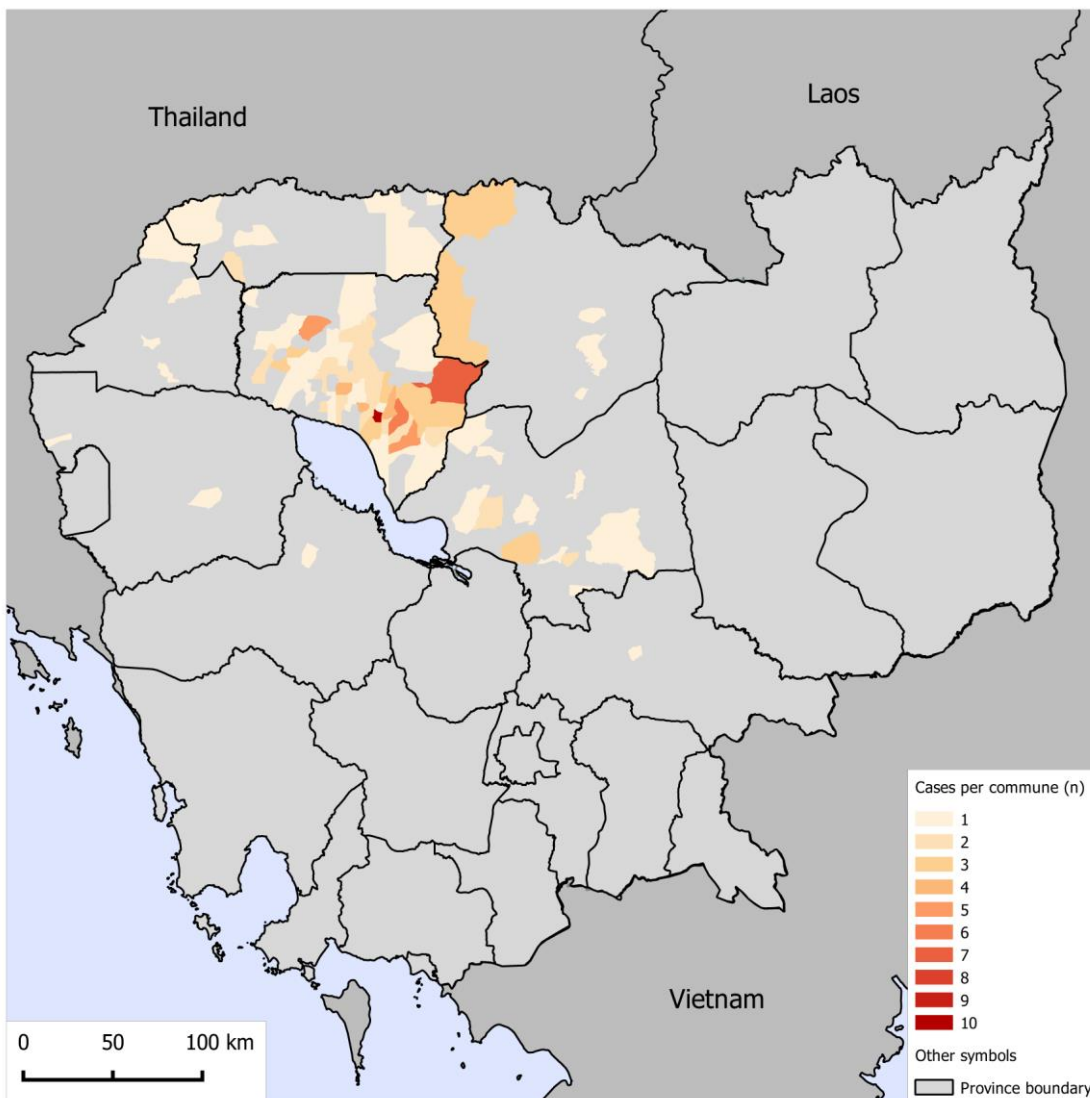

**Figure S4. Siem Reap province commune-level geographic distribution of culture-confirmed melioidosis cases admitted to Angkor Hospital for Children, 2009 – 2013**

Patients were mapped to the commune-level using data from the Cambodia National Census, 2008. AHC: Angkor Hospital for Children; SC: AHC Satellite Clinic

Study data overlaid on the Open Development Cambodia basemap

[<http://www.opendevdevelopmentcambodia.net/maps/downloads/>. Accessed 1st July 2016.]

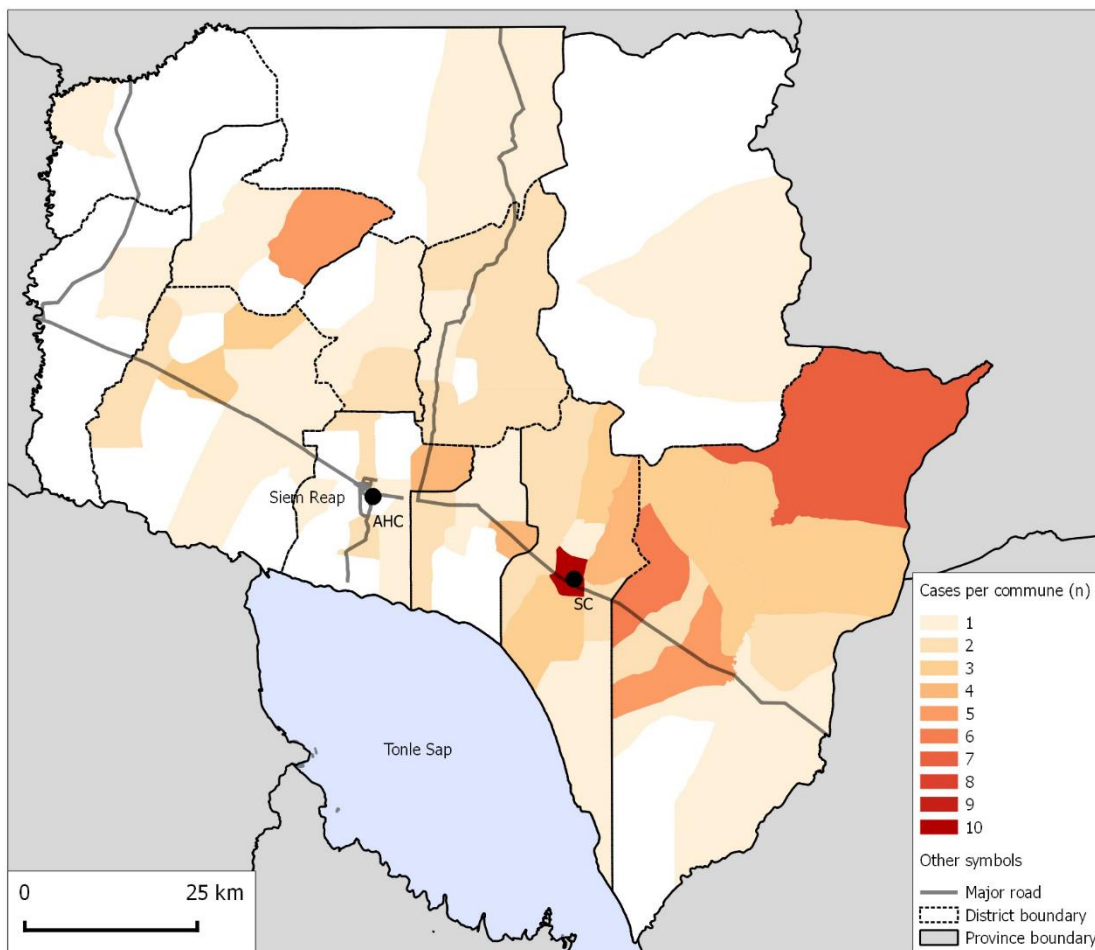

**Figure S5. Siem Reap province commune-level geographic distribution of all patients admitted to Angkor Hospital for Children, 2009 – 2013**

Patients were mapped to the commune-level using data from the Cambodia National Census, 2008. AHC: Angkor Hospital for Children; SC: AHC Satellite Clinic

Study data overlaid on the Open Development Cambodia basemap

[<http://www.opendevdevelopmentcambodia.net/maps/downloads/>. Accessed 1st July 2016.]

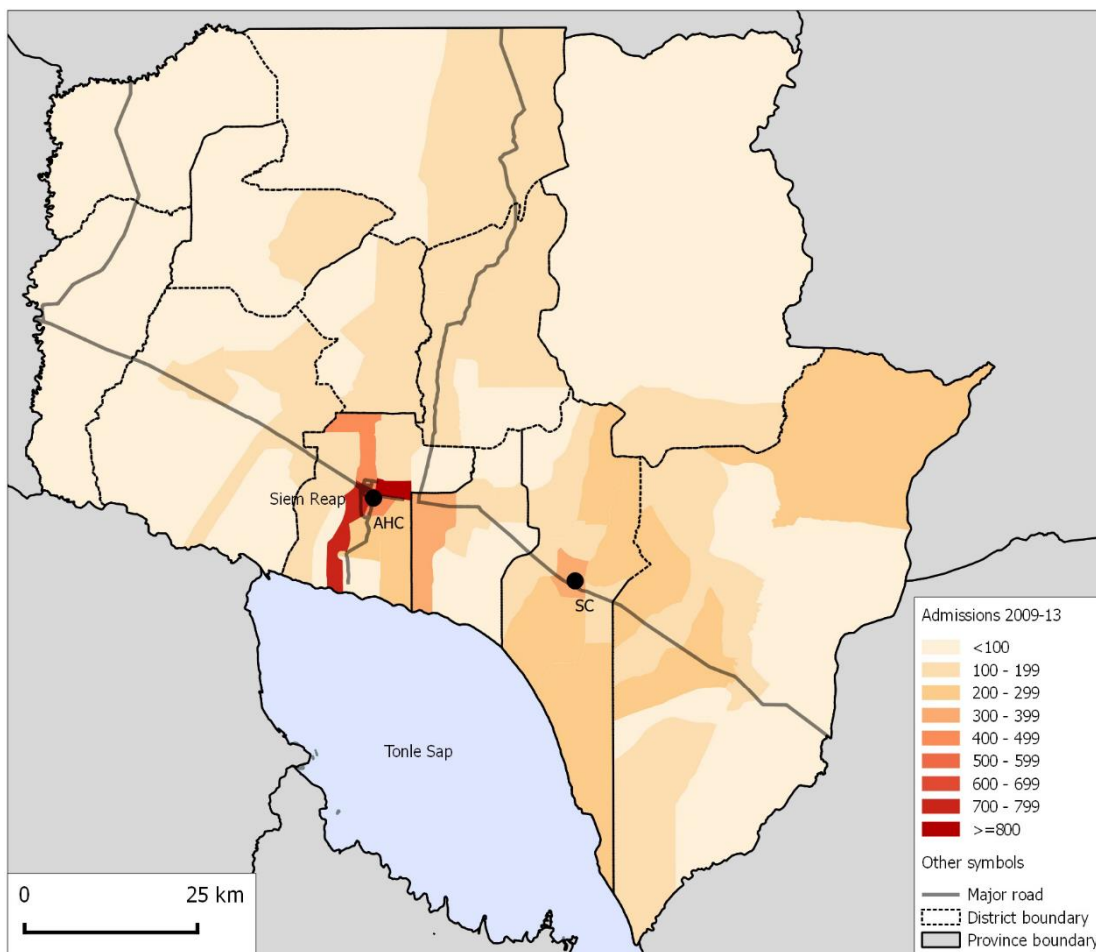

**Figure S6. Age distribution of 173 melioidosis cases presenting to Angkor Hospital for Children, 2009 – 2013**

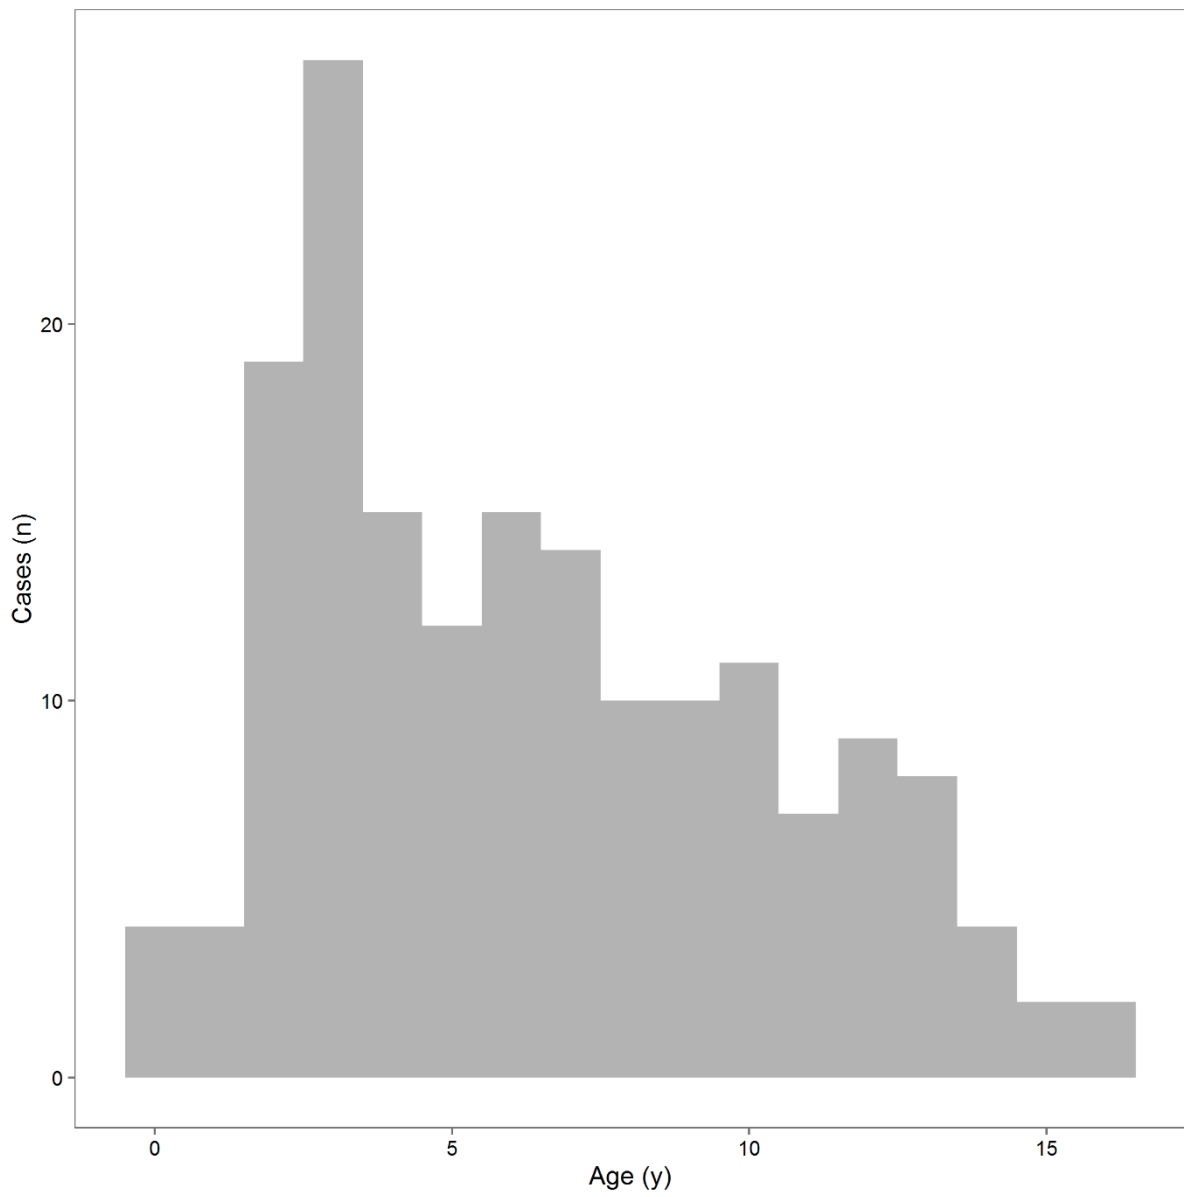

*Figure S7. Annual Siem Reap commune level melioidosis incidence estimates in children aged <15 years*

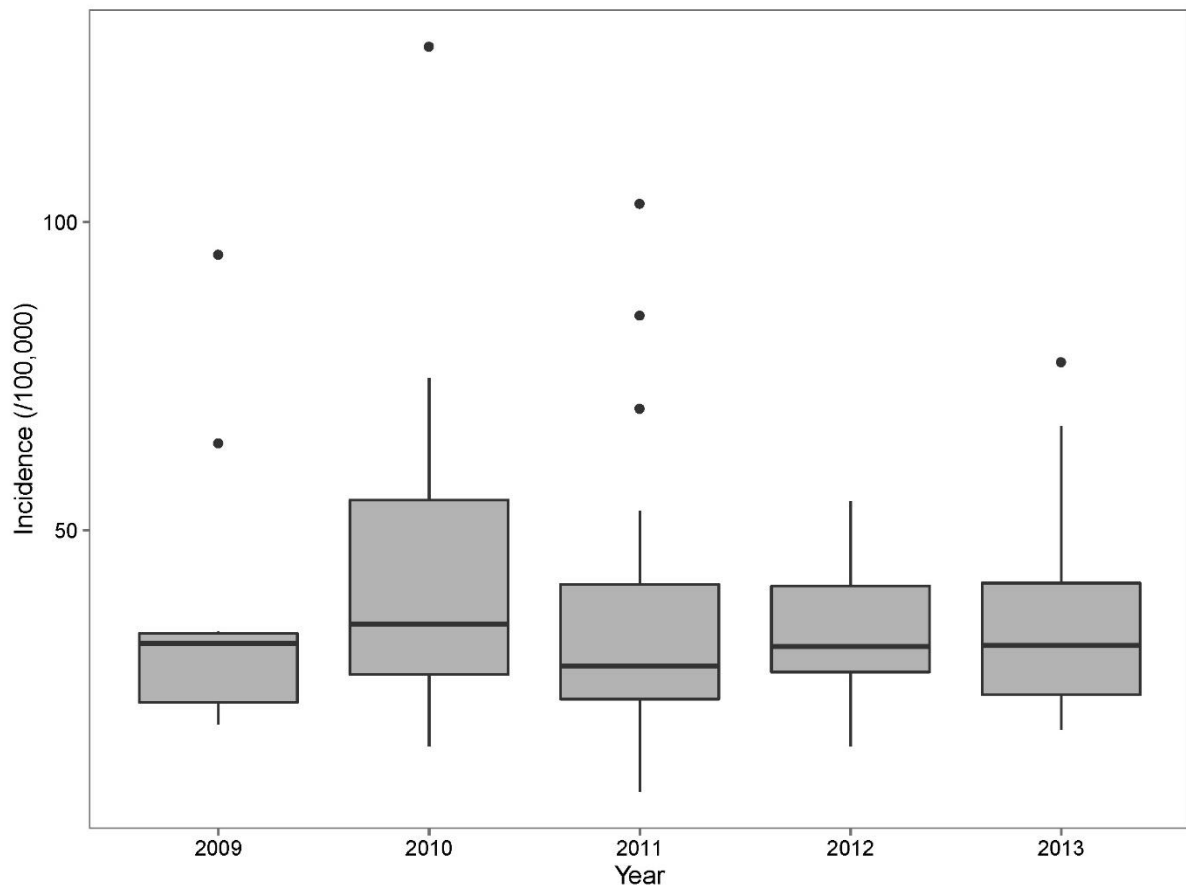

Supplement: 12879_2016_2034_MOESM1_ESM.pdf [file 12879_2016_2034_MOESM1_ESM.pdf]
